# Supplementary material
Source: publisher site journal article supplement (https://www.dovepress.com/article/332098)
Supplement: Supplementary file 1 [file get_supplementary_file.php]

ORIGINAL RESEARCH

Shujing Huang et al

**The interaction between self-reported sleep duration and physical activity on peripheral artery disease in Chinese adults: a cross-sectional analysis in the Tianning Cohort Study**

Shujing Huang 1*; Hongyan Sun 2*; Jia Yu 3; Hongfei Shi 2; Liyun Ren 3; Yan He 3; Mingzhi Zhang 3; Hao Peng 3,4†; Heng Guo 1†.

1Department of Public Health, School of Medicine, Shihezi University, Shihezi, China.

2Center for Disease Prevention and Control of Tianning District, Changzhou, China.

3Department of Epidemiology, School of Public Health, Medical College of Soochow University, Suzhou, China.

4Jiangsu Key Laboratory of Preventive and Translational Medicine for Geriatric Diseases, Suzhou, China.

*These authors contributed equally to this work.

†**Corresponding author**: Heng Guo, MD, PhD

Department of Public Health, School of Medicine, Shihezi University. North 2nd Road, Shihezi, China 832000. Phone: +86 993 205 7153, Email: shzuguoheng@foxmail.com

**and** Hao Peng, MD, PhD

Department of Epidemiology, School of Public Health, Medical College of Soochow University. 199 Renai Road, Industrial Park, Suzhou, China 215123. Phone: +86 512 6588 0078, Fax: +86 512 6588 0052, Email: penghao@suda.edu.cn

**Supplementary Table Captions:**

**Table S1.** The multivariate adjusted associations of sleep quality and PSQI components with ABI or PAD (N=5130)

**Table S2.** The multivariate adjusted associations of sleep duration and physical activity with ABI or PAD (N=4817)

**Table S3.** The interaction between sleep duration and physical activity in the prevalence of PAD (N=4817)

**Supplementary Tables**

**Table S1.** The multivariate adjusted associations of sleep quality and PSQI components with ABI or PAD (N=5130)

| Variables | ABI | |  | PAD | |
| --- | --- | --- | --- | --- | --- |
| β (SE) a | *P* value |  | OR (95% CI) a | *P* value |
| Sleep quality b | 0.01 (0.01) | 0.184 |  | 0.95 (0.77, 1.18) | 0.668 |
| Sleep latency c | 0 (0.01) | 0.501 | 1.07 (0.83, 1.38) | 0.595 |
| Habitual sleep efficiency c | 0 (0.01) | 0.878 | 1.09 (0.81, 1.46) | 0.584 |
| Sleep disturbance c | 0.02 (0.01) | **0.049** | 0.67 (0.38, 1.20) | 0.181 |
| Use of sleeping medication c | −0.02 (0.01) | 0.168 | 1.33 (0.77, 2.28) | 0.308 |
| Daytime dysfunction c | 0.02 (0.01) | **0.010** | 0.69 (0.50, 0.95) | **0.022** |

**Notes:** a, Adjusted for age, sex, education level, depressive symptom, obstructive sleep apnea syndrome, cigarette smoking, alcohol consumption, physical activity, body mass index, systolic blood pressure, diastolic blood pressure, diabetes mellitus, total cholesterol, low-density lipoprotein cholesterol. Bolding represented *P*<0.05.

b, In Pittsburgh Sleep Quality Index (PSQI), poor sleep quality was defined by ≥5 according to recommendation. Good sleep quality was used as reference.

c, Scores of the PSQI components 0 or 1 were integrated into one group as a reference, and 2 or 3 into another group.

**Abbreviations:** ABI, ankle-brachial index; PAD, peripheral artery disease.

**Table S2.** The multivariate adjusted associations of sleep duration and physical activity with ABI or PAD (N=4817)

| Variables | ABI | | |  | PAD | | |
| --- | --- | --- | --- | --- | --- | --- | --- |
| Mean ± SD | β (SE) a | *P* value | N (%) | OR (95% CI) a | *P* value |
| Sleep duration (h/night) |  |  |  |  |  |  |  |
| <6 | 1.08 ± 0.13 | 0 (0.01) | 0.903 | 30 (9.7) | 0.97 (0.64, 1.47) | 0.876 |
| 6-8.9 | 1.08 ± 0.15 | ref | - | 415 (10.2) | ref | - |
| ≥9 | 1.05 ± 0.18 | −0.03 (0.01) | **0.001** | 61 (14.2) | 1.44 (1.07, 1.95) | **0.017** |
| Physical activity |  |  |  |  |  |  |
| Active | 1.08 ± 0.15 | ref | - | 347 (9.7) | ref | - |
| Inactive | 1.06 ± 0.16 | −0.02 (0.01) | **<0.001** | 159 (12.9) | 1.37 (1.12, 1.69) | **0.003** |

**Notes:** a, Adjusted for age, sex, education level, depressive symptom, obstructive sleep apnea syndrome, cigarette smoking, alcohol consumption, body mass index, systolic blood pressure, diastolic blood pressure, diabetes mellitus, total cholesterol, low-density lipoprotein cholesterol. Bolding represented *P*<0.05.

**Abbreviations:** ABI, ankle-brachial index; PAD, peripheral artery disease.

**Table** **S3.** The interaction between sleep duration and physical activity in the prevalence of PAD (N=4817)

| Prolonged sleep duration | Physical inactivity | | | |
| --- | --- | --- | --- | --- |
| (−) | | (+) | |
| N with PAD (%) | OR (95%CI); *P* | N with PAD (%) | OR (95%CI); *P* |
| (−) | 312 (9.5) | ref | 133 (12.1) | 1.30 (1.04, 1.62); *P*=**0.022** |
| (+) | 35 (11.9) | 1.22 (0.83, 1.81); *P*=0.312 | 26 (19.3) | 2.47 (1.57, 3.90); *P***<0.001** |

**Notes:** Measure of interaction on additive scale: RERI (95% CI) =0.95 (−0.24, 2.15); AP (95% CI) =0.38 (0.04, 0.73); S (95% CI) =2.83 (0.78, 10.25).

Measure of interaction on multiplicative scale: OR (95% CI) =1.56 (0.84, 2.88).

ORs were adjusted for age, sex, education level, depressive symptom, obstructive sleep apnea syndrome, cigarette smoking, alcohol consumption, body mass index, systolic blood pressure, diastolic blood pressure, diabetes mellitus, total cholesterol, low-density lipoprotein cholesterol.

Bolding represented *P*<0.05.

**Abbreviations:** PAD, peripheral artery disease.
